# Supplementary material
Source: PubMed Central journal article supplement (PMC3850290)
Supplement: NIHMS528204-supplement-1.pdf [file NIHMS528204-supplement-1.pdf]

eAppendix Table 1A. Association of measures of quality of life and depression with exposure to the Dutch famine during gestation, among 923 Dutch men and women assessed in 2003-05.

|                                                       | Period of famine exposure |                      |                     |                      |                      |
|-------------------------------------------------------|---------------------------|----------------------|---------------------|----------------------|----------------------|
|                                                       | Any exposure              | Weeks 1-10           | Weeks 11-20         | Weeks 21-30          | Weeks 31 to delivery |
| SF-36                                                 |                           |                      |                     |                      |                      |
| Mental component score (MCS)                          | 0.23 (-0.98, 1.45)        | -0.54 (-2.88, 1.77)  | 0.14 (-1.74, 2.01)  | -0.71 (-2.51, 1.09)  | 0.31 (-1.52, 2.14)   |
| Physical component score (PCS)                        | -0.80 (-0.21, 0.41)       | -0.81 (-3.06, 1.43)  | -0.01 (-1.86, 1.84) | -0.88 (-2.64, 0.89)  | -0.82 (-2.60, 0.97)  |
| Physical functioning (PF)                             | -2.47 (-5.07, 0.11)       | -1.46 (-6.30, 3.37)  | 0.27 (-3.69, 4.23)  | -1.70 (-5.48, 2.08)  | -5.01 (-8.83, -1.19) |
| Role limitations due to physical health problems (RP) | -3.31 (-8.03, 1.41)       | -6.70 (-15.48, 2.08) | -2.66 (-9.88, 4.55) | -1.17 (-8.06, 5.72)  | -2.63 (-9.59, 4.32)  |
| Bodily pain (BP)                                      | 0.036 (-2.95, 3.02)       | -1.80 (-7.39, 3.78)  | 1.73 (-2.84, 6.31)  | -2.73 (-7.10, 1.64)  | 1.28 (-3.13, 5.70)   |
| General health perceptions (GH)                       | -1.24 (-3.54, 1.07)       | -1.26 (-5.57, 3.04)  | -0.42 (-3.95, 3.10) | -2.82 (-6.19, 0.55)  | 0.28 (-3.12, 3.69)   |
| Vitality (VT)                                         | -0.16 (-2.37, 2.34)       | -0.96 (-5.39, 3.46)  | -0.48 (-4.09, 3.13) | -0.27 (-3.72, 3.18)  | -1.00 (-4.49, 2.49)  |
| Social functioning (SF)                               | 0.32 (-2.33, 2.98)        | 1.94 (-3.03, 6.92)   | 1.42 (-2.65, 5.49)  | -2.38 (-6.27, 1.51)  | -0.32 (-4.23, 3.61)  |
| Role limitations due to emotional problems (RE)       | -2.46 (-6.63, 1.72)       | -5.19 (-13.08, 2.70) | -3.38 (-9.80, 3.04) | -1.89, (-8.04, 4.26) | -2.04 (-8.26, 4.18)  |
| General mental health (MH)                            | 0.29 (-1.80, 2.38)        | -2.04 (-6.02, 1.93)  | 1.59 (-1.63, 4.82)  | -1.63 (-4.72, 1.46)  | 0.21 (-2.92, 3.34)   |
| CES-D                                                 | 0.86 (-0.03, 1.75)        | 0.54 (-1.19, 2.27)   | 0.72 (-0.66, 2.11)  | 1.26 (-0.075, 2.59)  | 0.30 (-1.05, 1.65)   |

Estimates are linear regression coefficients and associated 95% CIs. Models are adjusted for age, age squared gender, schooling attainment, and familial clustering. Comparison group is combined hospital and sibling controls.

The mental and physical component scores are standardized to mean 50 and SD 10. The CES-D has a theoretical range of 0-60 points, and this population has a mean of 11.6 and a SD of 7.4.

Wald test (4 df) for set of 4 10-week periods: All  $p > 0.20$

eAppendix Table 1B. Association of measures of quality of life and depression (dichotomized at or close to the population median) with exposure to the Dutch famine during gestation, among 923 Dutch men and women assessed in 2003-05.

|                                                       | Period of famine exposure |                   |                   |                   |                      |
|-------------------------------------------------------|---------------------------|-------------------|-------------------|-------------------|----------------------|
|                                                       | Any exposure              | Weeks 1-10        | Weeks 11-20       | Weeks 21-30       | Weeks 31 to delivery |
| SF-36                                                 |                           |                   |                   |                   |                      |
| Mental component score (MCS)                          | 1.15 (0.82, 1.62)         | 0.63 (0.33, 1.19) | 1.06 (0.63, 1.79) | 1.39 (0.84, 2.30) | 0.92 (0.56, 1.51)    |
| Physical component score (PCS)                        | 0.92 (0.68, 1.26)         | 1.18 (0.66, 2.13) | 0.94 (0.58, 1.52) | 0.79 (0.50, 1.25) | 1.12 (0.71, 1.78)    |
| Physical functioning (PF)                             | 0.71 (0.52, 0.96)         | 0.80 (0.46, 1.41) | 0.94 (0.60, 1.48) | 0.77 (0.49, 1.19) | 0.66 (0.43, 1.03)    |
| Role limitations due to physical health problems (RP) | 0.77 (0.55, 1.06)         | 0.64 (0.36, 1.14) | 0.82 (0.51, 1.33) | 0.83 (0.52, 1.31) | 0.82 (0.51, 1.31)    |
| Bodily pain (BP)                                      | 0.89 (0.62, 1.27)         | 0.97 (0.50, 1.93) | 1.12 (0.64, 1.95) | 0.63 (0.37, 1.08) | 1.06 (0.62, 1.81)    |
| General health perceptions (GH)                       | 0.87 (0.64, 1.19)         | 0.94 (0.53, 1.68) | 0.68 (0.42, 1.10) | 0.80 (0.51, 1.26) | 1.17 (0.75, 1.83)    |
| Vitality (VT)                                         | 1.02 (0.72, 1.46)         | 0.70 (0.36, 1.34) | 0.97 (0.56, 1.66) | 1.11 (0.66, 1.86) | 0.86 (0.51, 1.45)    |
| Social functioning (SF)                               | 1.04 (0.75, 1.45)         | 1.07 (0.58, 1.98) | 0.95 (0.58, 1.58) | 1.32 (0.81, 2.14) | 0.75 (0.46, 1.22)    |
| Role limitations due to emotional problems (RE)       | 0.74 (0.51, 1.09)         | 0.70 (0.38, 1.38) | 0.80 (0.45, 1.40) | 0.66 (0.39, 1.13) | 0.76 (0.44, 1.32)    |
| General mental health (MH)                            | 0.97 (0.69, 1.36)         | 0.50 (0.25, 0.98) | 1.12 (0.66, 1.91) | 0.92 (0.55, 1.52) | 1.04 (0.63, 1.72)    |
| CES-D                                                 | 1.45 (0.98, 2.12)         | 1.02 (0.50, 2.09) | 1.55 (0.86, 2.80) | 1.71 (0.96, 3.04) | 1.16 (0.67, 2.04)    |

Estimates are odds ratios and associated 95% CIs. Models are adjusted for age, age squared gender, schooling attainment, and familial clustering. Comparison group is combined hospital and sibling controls.

The mental and physical component scores are standardized to mean 50 and SD 10. The CES-D has a theoretical range of 0-60 points, and this population has a mean of 11.6 and a SD of 7.4.

Wald test (4 df) for overall test of significance for set of 4 10-week periods: All  $p > 0.20$

eAppendix Table 2A. Association of measures of quality of life and depression with exposure to the Dutch famine during gestation, among 629 Dutch men and women assessed in 2003-05.

|                                | Period of famine exposure |                      |                     |                     |                      |
|--------------------------------|---------------------------|----------------------|---------------------|---------------------|----------------------|
|                                | Any exposure              | Weeks 1-10           | Weeks 11-20         | Weeks 21-30         | Weeks 31 to delivery |
| SF-36                          |                           |                      |                     |                     |                      |
| Mental component score (MCS)   | 1.17 (-0.67, 3.00)        | -0.46 (-3.04, 2.13)  | 0.084 (-2.19, 2.36) | -0.24 (-2.31, 1.82) | 0.074 (-2.22, 2.37)  |
| Physical component score (PCS) | -1.18 (-2.89, 0.51)       | -0.88 (-3.28, 1.52)  | -0.25 (-2.36, 1.86) | -0.95 (-2.86, 0.97) | -1.07 (-3.20, 1.06)  |
| CES-D                          | -0.40 (-1.80, 1.00)       | -0.093 (-2.07, 1.88) | 0.60 (-1.14, 2.33)  | 0.58 (-1.00, 2.16)  | -0.29 (-2.04, 1.46)  |

Estimates are linear regression coefficients and associated 95% CIs. Models are adjusted for age, age squared gender, schooling attainment, and familial clustering. Comparison group is hospital controls.

The mental and physical component scores are standardized to mean 50 and SD 10. The CES-D has a theoretical range of 0-60 points, and this population has a mean of 11.6 and a SD of 7.4.

Wald test (4 df) for overall test of significance for set of 4 10-week periods: All  $p > 0.20$

eAppendix Table 2B. Association of measures of quality of life and depression with exposure to the Dutch famine during gestation, among 276 same-sex sibling pairs of Dutch men and women assessed in 2003-05

|                                | Period of famine exposure |                        |                        |                        |                        |
|--------------------------------|---------------------------|------------------------|------------------------|------------------------|------------------------|
|                                | Any exposure              | Weeks 1-10             | Weeks 11-20            | Weeks 21-30            | Weeks 31 to delivery   |
| SF-36                          |                           |                        |                        |                        |                        |
| Mental component score (MCS)   | 0.49<br>(-2.03, 3.00)     | -0.75<br>(-5.22, 3.71) | 0.66<br>(-2.52, 3.84)  | -2.67<br>(-5.79, 0.47) | 3.27<br>(-0.25, 6.80)  |
| Physical component score (PCS) | -0.091<br>(-2.80, 2.61)   | -0.84<br>(-5.83, 4.15) | 0.16<br>(-3.39, 3.71)  | -1.39<br>(-4.89, 2.11) | 0.35<br>(-3.59, 4.29)  |
| CES-D                          | 1.08<br>(-0.68, 2.83)     | 1.15<br>(-1.98, 4.27)  | -0.10<br>(-2.33, 2.12) | 2.18<br>(-0.011, 4.38) | -0.18<br>(-2.65, 2.29) |

Estimates are within-pair mean differences and associated 95% CIs. Models are adjusted for within-pair differences in age and body mass index and any additional 10-week periods of exposure of the affected sibling.

The mental and physical component scores are standardized to mean 50 and SD 10. The CES-D has a theoretical range of 0-60 points, and this population has a mean of 11.6 and a SD of 7.4.

Wald test (4 df) for overall test of significance for set of 4 10-week periods: All  $p > 0.20$

---

eAppendix Table 3A. Association of birth weight with measures of quality of life and depression, among 629 Dutch men and women assessed in 2003-05.

---

|                                | Estimate (95% confidence interval) |
|--------------------------------|------------------------------------|
|                                | per kg of birth weight             |
| Mental component score (MCS)   | 0.97 (-0.55, 2.49)                 |
| Physical component score (PCS) | 0.23 (-1.18, 1.64)                 |
| CES-D                          | -0.21 (-1.37, 0.95)                |

---

Estimates are linear regression coefficients and associated 95% CIs. Models are adjusted for age, age squared, gender, and schooling attainment. Includes only hospital births (all siblings are missing birth weight).

MCS and PCS are standardized to mean 50 and SD 10. The CES-D has a theoretical range of 0-60 points, and this population has a mean of 11.6 and a SD of 7.4.

---

eAppendix Table 3B. Association of measures of quality of life and depression with exposure to the Dutch famine during gestation, among 629 Dutch men and women assessed in 2003-05.

|                                | Period of famine exposure |                     |                     |                      |                      |
|--------------------------------|---------------------------|---------------------|---------------------|----------------------|----------------------|
|                                | Any exposure              | Weeks 1-10          | Weeks 11-20         | Weeks 21-30          | Weeks 31 to delivery |
| SF-36                          |                           |                     |                     |                      |                      |
| Mental component score (MCS)   | 1.26 (-0.58, 3.10)        | -0.50 (-6.09, 2.08) | 0.007 (-2.27, 2.28) | -0.045 (-2.12, 2.03) | 0.35 (-1.97, 2.67)   |
| Physical component score (PCS) | -1.16 (-2.87, 0.55)       | -0.92 (-3.32, 1.49) | -0.20 (-2.32, 1.92) | -0.98 (-2.91, 0.95)  | -1.08 (-3.24, 1.08)  |
| CES-D                          | -0.40 (-1.81, 1.00)       | -0.11 (-2.09, 1.86) | 0.67 (-1.07, 2.40)  | 0.49 (-1.09, 2.08)   | -0.37 (-2.15, 1.40)  |

Estimates are linear regression coefficients and associated 95% CIs. Models are adjusted for exposure in adjacent 10-week periods, age, age squared, gender, schooling attainment, and birthweight. Comparison group is hospital controls (all siblings are missing birth weight). MCS and PCS are standardized to mean 50 and SD 10. The CES-D has a theoretical range of 0-60 points, and this population has a mean of 11.6 and a SD of 7.4.

Wald test (4 df) for overall test of significance for set of 4 10-week periods: All  $p > 0.70$
